# Supplementary material
Source: publisher site journal article supplement (https://www.spandidos-publications.com/4102/downloadSupplementary)
Supplement: Supplementary file 1 [file downloadSupplementary]

Table SI. Pubmed (<https://pubmed.ncbi.nlm.nih.gov/>) database search results.

| Database | Search terms                                                                                                                                                                                                                                                                                                                                                                                                                                                                                                                                                                                                                                                                                                                                                                                                                              |
|----------|-------------------------------------------------------------------------------------------------------------------------------------------------------------------------------------------------------------------------------------------------------------------------------------------------------------------------------------------------------------------------------------------------------------------------------------------------------------------------------------------------------------------------------------------------------------------------------------------------------------------------------------------------------------------------------------------------------------------------------------------------------------------------------------------------------------------------------------------|
| Pubmed   | <p>(((garlic[Title/Abstract] OR allium[Title/Abstract]) OR allicin[Title/Abstract]) OR allitridum[Title/Abstract]) AND (((((((("stomach"[MeSH Terms] OR "stomach"[All Fields]) OR ("stomach"[MeSH Terms] OR "stomach"[All Fields] OR "gastric"[All Fields])) AND ((neoplasms[Title/Abstract] OR cancer[Title/Abstract]) OR tumor[Title/Abstract])) OR (colon[Title/Abstract] AND ((neoplasms[Title/Abstract] OR cancer[Title/Abstract]) OR tumor[Title/Abstract]))) OR (oesophagus[Title/Abstract] AND ((neoplasms[Title/Abstract] OR cancer[Title/Abstract]) OR tumor[Title/Abstract]))) OR (colorectal[Title/Abstract] AND ((neoplasms[Title/Abstract] OR cancer[Title/Abstract]) OR tumor[Title/Abstract]))) OR (pancreatic[Title/Abstract] AND ((neoplasms[Title/Abstract] OR cancer[Title/Abstract]) OR tumor[Title/Abstract])))</p> |

Table SII. Embase (<https://www.embase.com/landing?status=grey>) database search results.

| No. | Query strategy                                                     | Results   |
|-----|--------------------------------------------------------------------|-----------|
| #14 | #3 AND #13                                                         | 343       |
| #13 | #8 AND #9 AND #10 OR#11 OR#12                                      | 481,599   |
| #12 | #1 AND #7                                                          | 103,846   |
| #11 | #1 AND #6                                                          | 182,655   |
| #10 | #1 AND #5                                                          | 4,153     |
| #9  | #1 AND #4                                                          | 126,961   |
| #8  | #1 AND #2                                                          | 142,542   |
| #7  | pancreatic:ab,ti                                                   | 265,050   |
| #6  | colorectal:ab,ti                                                   | 219,193   |
| #5  | oesophagus:ab,ti                                                   | 16,328    |
| #4  | colon:ab,ti                                                        | 231,832   |
| #3  | garlic:ab,ti ORallium:ab,ti ORallicin:ab,ti OR<br>allitridum:ab,ti | 12,206    |
| #2  | gastric:ab,ti OR stomach:ab,ti                                     | 426,504   |
| #1  | cancer:ab,ti OR tumor:ab,ti OR neoplasms:ab,ti                     | 3,294,973 |

Table SIII. Cochrane (<https://www.cochranelibrary.com/>) database search results.

| No. | Query strategy                                                | Results |
|-----|---------------------------------------------------------------|---------|
| #1  | (garlic):ti,kw<br>(Word variations have been searched)        | 637     |
| #2  | (cancer):ti,ab,kw<br>(Word variations have been searched)     | 151023  |
| #3  | (tumor):ti,ab,kw<br>(Word variations have been searched)      | 68059   |
| #4  | (neoplasms):ti,ab,kw<br>(Word variations have been searched)  | 75240   |
| #5  | #2 or #3 or #4                                                | 190528  |
| #6  | (gastric):ti,ab,kw<br>(Word variations have been searched)    | 25209   |
| #7  | (stomach):ti,ab,kw<br>(Word variations have been searched)    | 17645   |
| #8  | (colon):ti,ab,kw<br>(Word variations have been searched)      | 18648   |
| #9  | (colorectal):ti,ab,kw<br>(Word variations have been searched) | 17540   |
| #10 | (oesophagus):ti,ab,kw<br>(Word variations have been searched) | 985     |
| #11 | (pancreatic):ti,ab,kw<br>(Word variations have been searched) | 12649   |
| #12 | #6 or #7                                                      | 32145   |
| #13 | #12 and #5                                                    | 9314    |
| #14 | #8 and #5                                                     | 7275    |
| #15 | #9 and #5                                                     | 15073   |
| #16 | #10 and #5                                                    | 398     |
| #17 | #11 and #5                                                    | 5665    |
| #18 | #13 or #14 or #15 or #16 or #17                               | 20841   |
| #19 | (allitridum):ti,ab,kw<br>(Word variations have been searched) | 1       |
| #20 | (allium):ti,ab,kw<br>(Word variations have been searched)     | 121     |
| #21 | #1 or #19 or #20                                              | 696     |
| #22 | #21 and #18                                                   | 8       |

Table SIV. Subgroup analysis of studies of garlic consumption and gastric cancer risk.

| Parameter            | No. of studies | OR (95% CI)      | P heterogeneity | I <sup>2</sup> , % |
|----------------------|----------------|------------------|-----------------|--------------------|
| Study design         |                |                  |                 |                    |
| Prospective          | 3              | 1.07 (0.79,1.47) | 0.265           | 24.5               |
| Retrospective        | 8              | 0.50 (0.39,0.64) | 0.088           | 41.9               |
| Geographic area      |                |                  |                 |                    |
| Asia                 | 7              | 0.53 (0.33,0.73) | 0.006           | 65.0               |
| America              | 3              | 0.87 (0.52,1.47) | 0.020           | 69.4               |
| Europe               | 1              | 1.27 (0.61,2.64) | NA              | NA                 |
| Garlic intake        |                |                  |                 |                    |
| Yes vs. no           | 5              | 0.68 (0.50,0.93) | 0.146           | 38.9               |
| Every day vs. no     | 2              | 0.56 (0.39,0.82) | 0.472           | 0.0                |
| ≥3 times/week vs. no | 2              | 0.97 (0.46,2.04) | 0.045           | 67.7               |
| Others vs. no        | 2              | 0.46 (0.21,1.02) | 0.005           | 87.1               |

OR, odds ratio; CI, confidence interval.

Table SV. Subgroup analysis of studies of garlic consumption and colorectal cancer risk.

| Parameter       | No. of studies | OR (95% CI)      | P heterogeneity | I <sup>2</sup> , % |
|-----------------|----------------|------------------|-----------------|--------------------|
| Study design    |                |                  |                 |                    |
| Prospective     | 2              | 1.01 (0.62,1.65) | 0.081           | 60.2               |
| Retrospective   | 7              | 0.72 (0.62,0.84) | <0.001          | 71.4               |
| Geographic area |                |                  |                 |                    |
| Asia            | 2              | 0.53 (0.41,0.69) | 0.664           | 0.0                |
| America         | 2              | 0.67 (0.50,0.90) | 0.920           | 0.0                |
| Europe          | 4              | 0.84 (0.70,1.00) | 0.001           | 75.1               |
| Australia       | 1              | 0.86 (0.68,1.09) | NA              | NA                 |
| Garlic intake   |                |                  |                 |                    |
| Yes vs. no      | 4              | 0.85 (0.71,1.01) | 0.015           | 64.4               |
| Others vs. no   | 5              | 0.66 (0.52,0.83) | 0.018           | 66.4               |

OR, odds ratio; CI, confidence interval.

Table SVI. Quality assessment of NOS in case control studies.

| First author, year             | Selection                                                                                                                                                                        |                                                                                                                                                                         |                                                                                                                                   |                                                                                                                            | Comparability                                                                                                                                  | Exposure                                                                                                                                                                                                                                                                                                    |                                                                           |                                                                                                                                                                    | Total points <sup>a</sup> | (Refs.) |
|--------------------------------|----------------------------------------------------------------------------------------------------------------------------------------------------------------------------------|-------------------------------------------------------------------------------------------------------------------------------------------------------------------------|-----------------------------------------------------------------------------------------------------------------------------------|----------------------------------------------------------------------------------------------------------------------------|------------------------------------------------------------------------------------------------------------------------------------------------|-------------------------------------------------------------------------------------------------------------------------------------------------------------------------------------------------------------------------------------------------------------------------------------------------------------|---------------------------------------------------------------------------|--------------------------------------------------------------------------------------------------------------------------------------------------------------------|---------------------------|---------|
|                                | Is the case definition adequate?                                                                                                                                                 | Representativeness of the cases                                                                                                                                         | Selection of Controls                                                                                                             | Definition of Controls                                                                                                     | Comparability of cases and controls on the basis of the design or analysis                                                                     | Ascertainment of exposure                                                                                                                                                                                                                                                                                   | Same method of ascertainment for cases and controls                       | Non-response rate                                                                                                                                                  |                           |         |
| De Stefani <i>et al</i> , 2001 | <ul style="list-style-type: none"> <li>a) yes, with independent validation ★</li> <li>b) yes, e.g. record linkage or based on self reports</li> <li>c) no description</li> </ul> | <ul style="list-style-type: none"> <li>a) consecutive or obviously representative series of cases ★</li> <li>b) potential for selection biases or not stated</li> </ul> | <ul style="list-style-type: none"> <li>a) community controls</li> <li>b) hospital controls</li> <li>c) no description</li> </ul>  | <ul style="list-style-type: none"> <li>a) no history of disease (endpoint)</li> <li>b) no description of source</li> </ul> | <ul style="list-style-type: none"> <li>a) study controls for garlic intake ★</li> <li>b) study controls for any additional factor ★</li> </ul> | <ul style="list-style-type: none"> <li>a) secure record (e.g. surgical records)</li> <li>b) structured interview where blind to case/control status ★</li> <li>c) interview not blinded to case/control status</li> <li>d) written self report or medical record only</li> <li>e) no description</li> </ul> | <ul style="list-style-type: none"> <li>a) yes ★</li> <li>b) no</li> </ul> | <ul style="list-style-type: none"> <li>a) same rate for both groups</li> <li>b) non-respondents described</li> <li>c) rate different and no designation</li> </ul> | 6 stars                   | (34)    |
| Setiawan <i>et al</i> , 2005   | <ul style="list-style-type: none"> <li>a) yes, with independent validation ★</li> <li>b) yes, e.g. record linkage or based on self</li> </ul>                                    | <ul style="list-style-type: none"> <li>a) consecutive or obviously representative series of cases ★</li> <li>b) potential for selection biases or not stated</li> </ul> | <ul style="list-style-type: none"> <li>a) community controls★</li> <li>b) hospital controls</li> <li>c) no description</li> </ul> | <ul style="list-style-type: none"> <li>a) no history of disease (endpoint)★</li> <li>b) no description of</li> </ul>       | <ul style="list-style-type: none"> <li>a) study controls for garlic intake ★</li> <li>b) study controls for any additional</li> </ul>          | <ul style="list-style-type: none"> <li>a) secure record (e.g. surgical records)</li> <li>b) structured interview where blind to case/control status ★</li> <li>c) interview not blinded to case/control st</li> </ul>                                                                                       | <ul style="list-style-type: none"> <li>a) yes ★</li> <li>b) no</li> </ul> | <ul style="list-style-type: none"> <li>a) same rate for both groups</li> <li>b) non-respond</li> </ul>                                                             | 8 stars                   | (35)    |

|                              |                                                                                                                    |                                                                                                                 |                                                                     |                                                                      |                                                                                        |                                                                                                                                                                                                                                   |                   |                                                                                                         |         |      |
|------------------------------|--------------------------------------------------------------------------------------------------------------------|-----------------------------------------------------------------------------------------------------------------|---------------------------------------------------------------------|----------------------------------------------------------------------|----------------------------------------------------------------------------------------|-----------------------------------------------------------------------------------------------------------------------------------------------------------------------------------------------------------------------------------|-------------------|---------------------------------------------------------------------------------------------------------|---------|------|
|                              | reports<br>c) no description                                                                                       |                                                                                                                 |                                                                     | f source                                                             | al factor ★                                                                            | atus<br>d) written self report or medical record only<br>e) no description                                                                                                                                                        |                   | ents described<br>c) rate different and no designation                                                  |         |      |
| Munoz <i>et al</i> , 2001    | a) yes, with independent validation ★<br>b) yes, e.g. record linkage or based on self reports<br>c) no description | a) consecutive or obviously representative series of cases ★<br>b) potential for selection biases or not stated | a) community controls★<br>b) hospital controls<br>c) no description | a) no history of disease (endpoint)<br>b) no description of source   | a) study controls for garlic intake ★<br>b) study controls for any additional factor ★ | a) secure record (e.g. surgical records)<br>b) structured interview where blind to case/control status ★<br>c) interview not blinded to case/control status<br>d) written self report or medical record only<br>e) no description | a) yes ★<br>b) no | a) same rate for or both groups<br>b) non-respondents described<br>c) rate different and no designation | 7 stars | (37) |
| You <i>et al</i> , 1989      | a) yes, with independent validation ★<br>b) yes, e.g. record linkage or based on self reports<br>c) no description | a) consecutive or obviously representative series of cases ★<br>b) potential for selection biases or not stated | a) community controls★<br>b) hospital controls<br>c) no description | a) no history of disease (endpoint) ★<br>b) no description of source | a) study controls for garlic intake ★<br>b) study controls for any additional factor ★ | a) secure record (e.g. surgical records)<br>b) structured interview where blind to case/control status ★<br>c) interview not blinded to case/control status<br>d) written self report or medical record only<br>e) no description | a) yes ★<br>b) no | b) non-respondents described<br>c) rate different and no designation                                    | 8 stars | (38) |
| Takezaki <i>et al</i> , 2001 | a) yes, with independent validation ★                                                                              | a) consecutive or obviously representative series                                                               | a) community controls★<br>b) hospital c                             | a) no history of disease (en                                         | a) study controls for garlic intake                                                    | a) secure record (e.g. surgical records)<br>b) structured interview                                                                                                                                                               | a) yes ★          | b) non-respondents described                                                                            | 8 stars | (18) |

|                                     |                                                                                                                                   |                                                                                                                            |                                                                                    |                                                                                        |                                                                                                   |                                                                                                                                                                                                                                                          |                              |                                                                                 |                |             |
|-------------------------------------|-----------------------------------------------------------------------------------------------------------------------------------|----------------------------------------------------------------------------------------------------------------------------|------------------------------------------------------------------------------------|----------------------------------------------------------------------------------------|---------------------------------------------------------------------------------------------------|----------------------------------------------------------------------------------------------------------------------------------------------------------------------------------------------------------------------------------------------------------|------------------------------|---------------------------------------------------------------------------------|----------------|-------------|
|                                     | <p>b) yes, e.g. record linkage or based on self reports</p> <p>c) no description</p>                                              | <p>of cases ★</p> <p>b) potential for selection biases or not stated</p>                                                   | <p>ontrols</p> <p>c) no description</p>                                            | <p>dpoint)</p> <p>★</p> <p>b) no description of source</p>                             | <p>★</p> <p>b) study controls for any additional factor ★</p>                                     | <p>w where blind to case/control status ★</p> <p>c) interview not blinded to case/control status</p> <p>d) written self report or medical record only</p> <p>e) no description</p>                                                                       | <p>b) no</p>                 | <p>c) rate different and no designation</p>                                     |                |             |
| <p>Gao <i>et al</i>, 1999</p>       | <p>a) yes, with independent validation ★</p> <p>b) yes, e.g. record linkage or based on self reports</p> <p>c) no description</p> | <p>a) consecutive or obviously representative series of cases ★</p> <p>b) potential for selection biases or not stated</p> | <p>a) community controls★</p> <p>b) hospital controls</p> <p>c) no description</p> | <p>a) no history of disease (endpoint)</p> <p>★</p> <p>b) no description of source</p> | <p>a) study controls for garlic intake ★</p> <p>b) study controls for any additional factor ★</p> | <p>a) secure record (e.g. surgical records)</p> <p>b) structured interview where blind to case/control status ★</p> <p>c) interview not blinded to case/control status</p> <p>d) written self report or medical record only</p> <p>e) no description</p> | <p>a) yes ★</p> <p>b) no</p> | <p>b) non-respondents described</p> <p>c) rate different and no designation</p> | <p>8 stars</p> | <p>(40)</p> |
| <p>Pourfarzi <i>et al</i>, 2009</p> | <p>a) yes, with independent validation ★</p> <p>b) yes, e.g. record linkage or based on self reports</p> <p>c) no description</p> | <p>a) consecutive or obviously representative series of cases ★</p> <p>b) potential for selection biases or not stated</p> | <p>a) community controls★</p> <p>b) hospital controls</p> <p>c) no description</p> | <p>a) no history of disease (endpoint)</p> <p>★</p> <p>b) no description of source</p> | <p>a) study controls for garlic intake ★</p> <p>b) study controls for any additional factor ★</p> | <p>a) secure record (e.g. surgical records) b) structured interview where blind to case/control status ★</p> <p>c) interview not blinded to case/control status</p> <p>d) written self report or medical record only</p> <p>e) no description</p>        | <p>a) yes ★</p> <p>b) no</p> | <p>b) non-respondents described</p> <p>c) rate different and no designation</p> | <p>8 stars</p> | <p>(41)</p> |



|                          |                                                                                                                                   |                                                                                                                            |                                                                                    |                                                                                 |                                                                                                   |                                                                                                                                                                                                                                                   |                              |                                                                                 |         |      |
|--------------------------|-----------------------------------------------------------------------------------------------------------------------------------|----------------------------------------------------------------------------------------------------------------------------|------------------------------------------------------------------------------------|---------------------------------------------------------------------------------|---------------------------------------------------------------------------------------------------|---------------------------------------------------------------------------------------------------------------------------------------------------------------------------------------------------------------------------------------------------|------------------------------|---------------------------------------------------------------------------------|---------|------|
| Wang <i>et al</i> , 2018 | <p>a) yes, with independent validation ★</p> <p>b) yes, e.g. record linkage or based on self reports</p> <p>c) no description</p> | <p>a) consecutive or obviously representative series of cases ★</p> <p>b) potential for selection biases or not stated</p> | <p>a) community controls★</p> <p>b) hospital controls</p> <p>c) no description</p> | <p>a) no history of disease (endpoint) ★</p> <p>b) no description of source</p> | <p>a) study controls for garlic intake ★</p> <p>b) study controls for any additional factor ★</p> | <p>a) secure record (e.g. surgical records) b) structured interview where blind to case/control status ★</p> <p>c) interview not blinded to case/control status</p> <p>d) written self report or medical record only</p> <p>e) no description</p> | <p>a) yes ★</p> <p>b) no</p> | <p>b) non-respondents described</p> <p>c) rate different and no designation</p> | 8 stars | (43) |
| Levi <i>et al</i> , 1999 | <p>a) yes, with independent validation ★</p> <p>b) yes, e.g. record linkage or based on self reports</p> <p>c) no description</p> | <p>a) consecutive or obviously representative series of cases ★</p> <p>b) potential for selection biases or not stated</p> | <p>a) community controls★</p> <p>b) hospital controls</p> <p>c) no description</p> | <p>a) no history of disease (endpoint) ★</p> <p>b) no description of source</p> | <p>a) study controls for garlic intake ★</p> <p>b) study controls for any additional factor ★</p> | <p>a) secure record (e.g. surgical records) b) structured interview where blind to case/control status ★</p> <p>c) interview not blinded to case/control status</p> <p>d) written self report or medical record only</p> <p>e) no description</p> | <p>a) yes ★</p> <p>b) no</p> | <p>b) non-respondents described</p> <p>c) rate different and no designation</p> | 8 stars | (44) |
| Wu <i>et al</i> , 2018   | <p>a) yes, with independent validation ★</p> <p>b) yes, e.g. record linkage or based on self reports</p> <p>c) no description</p> | <p>a) consecutive or obviously representative series of cases ★</p> <p>b) potential for selection biases or not stated</p> | <p>a) community controls★</p> <p>b) hospital controls</p> <p>c) no description</p> | <p>a) no history of disease (endpoint) ★</p> <p>b) no description of source</p> | <p>a) study controls for garlic intake ★</p> <p>b) study controls for any additional factor ★</p> | <p>a) secure record (e.g. surgical records) b) structured interview where blind to case/control status ★</p> <p>c) interview not blinded to case/control status</p> <p>d) written self report or medical record only</p>                          | <p>a) yes ★</p> <p>b) no</p> | <p>b) non-respondents described</p> <p>c) rate different and no designation</p> | 8 stars | (12) |

|                                      |                                                                                                                    |                                                                                                                 |                                                                     |                                                                      |                                                                                        |                                                                                                                                                                                                                                |                   |                                                                      |         |      |
|--------------------------------------|--------------------------------------------------------------------------------------------------------------------|-----------------------------------------------------------------------------------------------------------------|---------------------------------------------------------------------|----------------------------------------------------------------------|----------------------------------------------------------------------------------------|--------------------------------------------------------------------------------------------------------------------------------------------------------------------------------------------------------------------------------|-------------------|----------------------------------------------------------------------|---------|------|
|                                      | on                                                                                                                 |                                                                                                                 |                                                                     |                                                                      |                                                                                        | nly<br>e) no description                                                                                                                                                                                                       |                   |                                                                      |         |      |
| Annema<br><i>et al</i> ,<br>2011     | a) yes, with independent validation ★<br>b) yes, e.g. record linkage or based on self reports<br>c) no description | a) consecutive or obviously representative series of cases ★<br>b) potential for selection biases or not stated | a) community controls★<br>b) hospital controls<br>c) no description | a) no history of disease (endpoint) ★<br>b) no description of source | a) study controls for garlic intake ★<br>b) study controls for any additional factor ★ | a) secure record (e.g. surgical records) b) structured interview where blind to case/control status ★<br>c) interview not blinded to case/control status<br>d) written self report or medical record only<br>e) no description | a) yes ★<br>b) no | b) non-respondents described<br>c) rate different and no designation | 8 stars | (50) |
| Franceschi<br><i>et al</i> ,<br>1997 | a) yes, with independent validation ★<br>b) yes, e.g. record linkage or based on self reports<br>c) no description | a) consecutive or obviously representative series of cases ★<br>b) potential for selection biases or not stated | a) community controls<br>b) hospital controls<br>c) no description  | a) no history of disease (endpoint) ★<br>b) no description of source | a) study controls for garlic intake ★<br>b) study controls for any additional factor ★ | a) secure record (e.g. surgical records) b) structured interview where blind to case/control status ★<br>c) interview not blinded to case/control status<br>d) written self report or medical record only<br>e) no description | a) yes ★<br>b) no | b) non-respondents described<br>c) rate different and no designation | 7 stars | (46) |
| Galeone<br><i>et al</i> ,<br>2006    | a) yes, with independent validation ★<br>b) yes, e.g. record linkage or based on self reports                      | a) consecutive or obviously representative series of cases ★<br>b) potential for selection biases or not stated | a) community controls<br>b) hospital controls<br>c) no description  | a) no history of disease (endpoint) ★<br>b) no description of source | a) study controls for garlic intake ★<br>b) study controls for any additional factor ★ | a) secure record (e.g. surgical records) b) structured interview where blind to case/control status ★<br>c) interview not blinded to case/control status<br>d) written self report                                             | a) yes ★<br>b) no | b) non-respondents described<br>c) rate different and no designation | 7 stars | (48) |

|                              |                                                                                                                    |                                                                                                                 |                                                                      |                                                                      |                                                                                        |                                                                                                                                                                                                                                |                   |                                                                      |         |          |
|------------------------------|--------------------------------------------------------------------------------------------------------------------|-----------------------------------------------------------------------------------------------------------------|----------------------------------------------------------------------|----------------------------------------------------------------------|----------------------------------------------------------------------------------------|--------------------------------------------------------------------------------------------------------------------------------------------------------------------------------------------------------------------------------|-------------------|----------------------------------------------------------------------|---------|----------|
|                              | c) no description                                                                                                  |                                                                                                                 |                                                                      |                                                                      |                                                                                        | or medical record only<br>e) no description                                                                                                                                                                                    |                   |                                                                      |         |          |
| Witte <i>et al</i> ,<br>1996 | a) yes, with independent validation ★<br>b) yes, e.g. record linkage or based on self reports<br>c) no description | a) consecutive or obviously representative series of cases ★<br>b) potential for selection biases or not stated | a) community controls ★<br>b) hospital controls<br>c) no description | a) no history of disease (endpoint) ★<br>b) no description of source | a) study controls for garlic intake ★<br>b) study controls for any additional factor ★ | a) secure record (e.g. surgical records) b) structured interview where blind to case/control status ★<br>c) interview not blinded to case/control status<br>d) written self report or medical record only<br>e) no description | a) yes ★<br>b) no | b) non-respondents described<br>c) rate different and no designation | 8 stars | (49)     |
| Yuan <i>et al</i> ,<br>2020  | a) yes, with independent validation ★<br>b) yes, e.g. record linkage or based on self reports<br>c) no description | a) consecutive or obviously representative series of cases ★<br>b) potential for selection biases or not stated | a) community controls<br>b) hospital controls<br>c) no description   | a) no history of disease (endpoint) ★<br>b) no description of source | a) study controls for garlic intake ★<br>b) study controls for any additional factor ★ | a) secure record (e.g. surgical records) b) structured interview where blind to case/control status ★<br>c) interview not blinded to case/control status<br>d) written self report or medical record only<br>e) no description | a) yes ★<br>b) no | b) non-respondents described<br>c) rate different and no designation | 7 stars | Ref (47) |

<sup>a</sup>NOS (29); [http://www.ohri.ca/programs/clinical\\_epidemiology/oxford.asp](http://www.ohri.ca/programs/clinical_epidemiology/oxford.asp). NOS, Newcastle-Ottawa quality assessment scale.

Table SVII. Quality assessment of NOS in case cohort studies.

| First author, year         | Selection                                                                                                                                                                                                                                                      |                                                                                                                                                               |                                                                                                                      |                                                                          | Comparability                                                                         | Outcome                                                                                              |                                                 |                                                                                                                                                                                                                                                                             | Total points <sup>a</sup> | (Refs.) |
|----------------------------|----------------------------------------------------------------------------------------------------------------------------------------------------------------------------------------------------------------------------------------------------------------|---------------------------------------------------------------------------------------------------------------------------------------------------------------|----------------------------------------------------------------------------------------------------------------------|--------------------------------------------------------------------------|---------------------------------------------------------------------------------------|------------------------------------------------------------------------------------------------------|-------------------------------------------------|-----------------------------------------------------------------------------------------------------------------------------------------------------------------------------------------------------------------------------------------------------------------------------|---------------------------|---------|
|                            | Representativeness of the exposed cohort                                                                                                                                                                                                                       | Selection of the non exposed cohort                                                                                                                           | Ascertainment of exposure                                                                                            | Demonstration that outcome of interest was not present at start of study | Comparability of cohorts on the basis of the design or analysis                       | Assessment of outcome                                                                                | Was follow-up long enough for outcomes to occur | Adequacy of follow up of cohorts                                                                                                                                                                                                                                            |                           |         |
| Dorant <i>et al</i> , 1996 | a) truly representative of the average garlic intake in the community<br>b) somewhat representative of the average garlic intake in the community ★<br>c) selected group of users e.g. nurses, volunteers<br>d) no description of the derivation of the cohort | a) drawn from the same community as the exposed cohort ★<br>b) drawn from a different source<br>c) no description of the derivation of the non exposed cohort | a) secure record (e.g. surgical records) ★<br>b) structured interview<br>c) written self report<br>d) no description | a) yes<br>b) no                                                          | a) study controls for garlic intake★<br>b) study controls for any additional factor ★ | a) independent<br>★ blind assessment<br>b) record linkage<br>c) self report<br><br>d) no description | a) yes<br>b) no                                 | a) complete follow up - all subjects accounted for<br>b) subjects lost to follow up unlikely to introduce bias - small number lost - > 10 % follow up, or description provided of those lost<br>c) follow up rate < 20% and no description of those lost<br>d) no statement | 6 stars                   | (36)    |
| Kim <i>et al</i> , 2018    | a) truly representative of the average garlic intake in the community<br>b) somewhat                                                                                                                                                                           | a) drawn from the same community as the exposed cohort ★                                                                                                      | a) secure record (e.g. surgical records) ★<br>b) structured interview                                                | a) yes<br>b) no                                                          | a) study controls for garlic intake★<br>b) study controls for                         | a) independent<br>★ blind assessment<br>b) record linkage                                            | a) yes ★<br>b) no                               | a) complete follow up - all subjects accounted for ★<br>b) subjects lost to follow up unlikely                                                                                                                                                                              | 7 stars                   | (39)    |

|                            |                                                                                                                                                                                                                                                                |                                                                                                                                                               |                                                                                                                      |                 |                                                                                        |                                                                                   |                                                                               |                                                                                                                                                                                                                                                                             |         |      |
|----------------------------|----------------------------------------------------------------------------------------------------------------------------------------------------------------------------------------------------------------------------------------------------------------|---------------------------------------------------------------------------------------------------------------------------------------------------------------|----------------------------------------------------------------------------------------------------------------------|-----------------|----------------------------------------------------------------------------------------|-----------------------------------------------------------------------------------|-------------------------------------------------------------------------------|-----------------------------------------------------------------------------------------------------------------------------------------------------------------------------------------------------------------------------------------------------------------------------|---------|------|
|                            | representative of the average garlic intake in the community<br>c) selected group of users e.g. nurses, volunteers<br>d) no description of the derivation of the cohort                                                                                        | b) drawn from a different source<br>c) no description of the derivation of the non exposed cohort                                                             | c) written self report<br>d) no description                                                                          |                 | any additional factor ★                                                                | c) self report<br>d) no description                                               |                                                                               | to introduce bias - small number lost - > 10 % follow up, or description provided of those lost<br>c) follow up rate < 20% and no description of those lost<br>d) no statement                                                                                              |         |      |
| Dorant <i>et al</i> , 1996 | a) truly representative of the average garlic intake in the community<br>b) somewhat representative of the average garlic intake in the ★ community<br>c) selected group of users e.g. nurses, volunteers<br>d) no description of the derivation of the cohort | a) drawn from the same community as the exposed cohort ★<br>b) drawn from a different source<br>c) no description of the derivation of the non exposed cohort | a) secure record (e.g. surgical records) ★<br>b) structured interview<br>c) written self report<br>d) no description | a) yes<br>b) no | a) study controls for garlic intake ★<br>b) study controls for any additional factor ★ | a) independent ★<br>b) blind assessment<br>c) record linkage<br>d) no description | a) yes (select an adequate follow up period for outcome of interest)<br>b) no | a) complete follow up - all subjects accounted for<br>b) subjects lost to follow up unlikely to introduce bias - small number lost - > 10 % follow up, or description provided of those lost<br>c) follow up rate < 20% and no description of those lost<br>d) no statement | 6 stars | (42) |

|                               |                                                                                                                                                                                                                                                              |                                                                                                                                                               |                                                                                                                      |                 |                                                                                        |                                                                                                      |                 |                                                                                                                                                                                                                                                                               |         |      |
|-------------------------------|--------------------------------------------------------------------------------------------------------------------------------------------------------------------------------------------------------------------------------------------------------------|---------------------------------------------------------------------------------------------------------------------------------------------------------------|----------------------------------------------------------------------------------------------------------------------|-----------------|----------------------------------------------------------------------------------------|------------------------------------------------------------------------------------------------------|-----------------|-------------------------------------------------------------------------------------------------------------------------------------------------------------------------------------------------------------------------------------------------------------------------------|---------|------|
| Steinmetz <i>et al</i> , 1994 | a) truly representative of the average garlic intake in the community<br>b) somewhat representative of the average garlic intake in the community<br>c) selected group of users e.g. nurses, volunteers<br>d) no description of the derivation of the cohort | a) drawn from the same community as the exposed cohort ★<br>b) drawn from a different source<br>c) no description of the derivation of the non exposed cohort | a) secure record (e.g. surgical records) ★<br>b) structured interview<br>c) written self report<br>d) no description | a) yes<br>b) no | a) study controls for garlic intake ★<br>b) study controls for any additional factor ★ | a) independent<br>★ blind assessment<br>b) record linkage<br>c) self report<br><br>d) no description | a) yes<br>b) no | a) complete follow up - all subjects accounted for ★<br>b) subjects lost to follow up unlikely to introduce bias - small number lost - > 10 % follow up, or description provided of those lost<br>c) follow up rate < 20% and no description of those lost<br>d) no statement | 6 stars | (45) |
|-------------------------------|--------------------------------------------------------------------------------------------------------------------------------------------------------------------------------------------------------------------------------------------------------------|---------------------------------------------------------------------------------------------------------------------------------------------------------------|----------------------------------------------------------------------------------------------------------------------|-----------------|----------------------------------------------------------------------------------------|------------------------------------------------------------------------------------------------------|-----------------|-------------------------------------------------------------------------------------------------------------------------------------------------------------------------------------------------------------------------------------------------------------------------------|---------|------|

<sup>a</sup>NOS (29); [http://www.ohri.ca/programs/clinical\\_epidemiology/oxford.asp](http://www.ohri.ca/programs/clinical_epidemiology/oxford.asp). NOS, Newcastle-Ottawa quality assessment scale.

Table SVIII. Egger's test.

| Cancer type                  | Std_Eff | Coef   | Std_Err | t     | P-value | 95% CI     |
|------------------------------|---------|--------|---------|-------|---------|------------|
| Garlic and gastric cancer    | slope   | -0.782 | 0.450   | -1.74 | 0.110   | -1.77,0.21 |
|                              | bias    | 1.181  | 1.654   | 0.71  | 0.490   | -2.46,4.82 |
| Garlic and colorectal cancer | slope   | -0.563 | 0.099   | -0.57 | 0.584   | -0.28,0.17 |
|                              | bias    | -1.507 | 0.934   | -1.61 | 0.141   | -3.62,0.61 |

CI, confidence interval; Std\_Eff, standard effect; Coef, regression coefficients; Std\_Err, standard error.
